# Supplementary material for: Design, synthesis and evaluation of benzenesulfonamide-substituted 1,5-diarylpyrazoles containing phenylacetohydrazide derivatives as COX-1/COX-2 agents against solid tumors
Source: Royal Society of Chemistry journal article supplement (doi:10.1039/c6ra02168a), 2016-01-01
Supplement: c6ra02168a18.pdf [file c6ra02168a18.pdf]

LXY-46-26

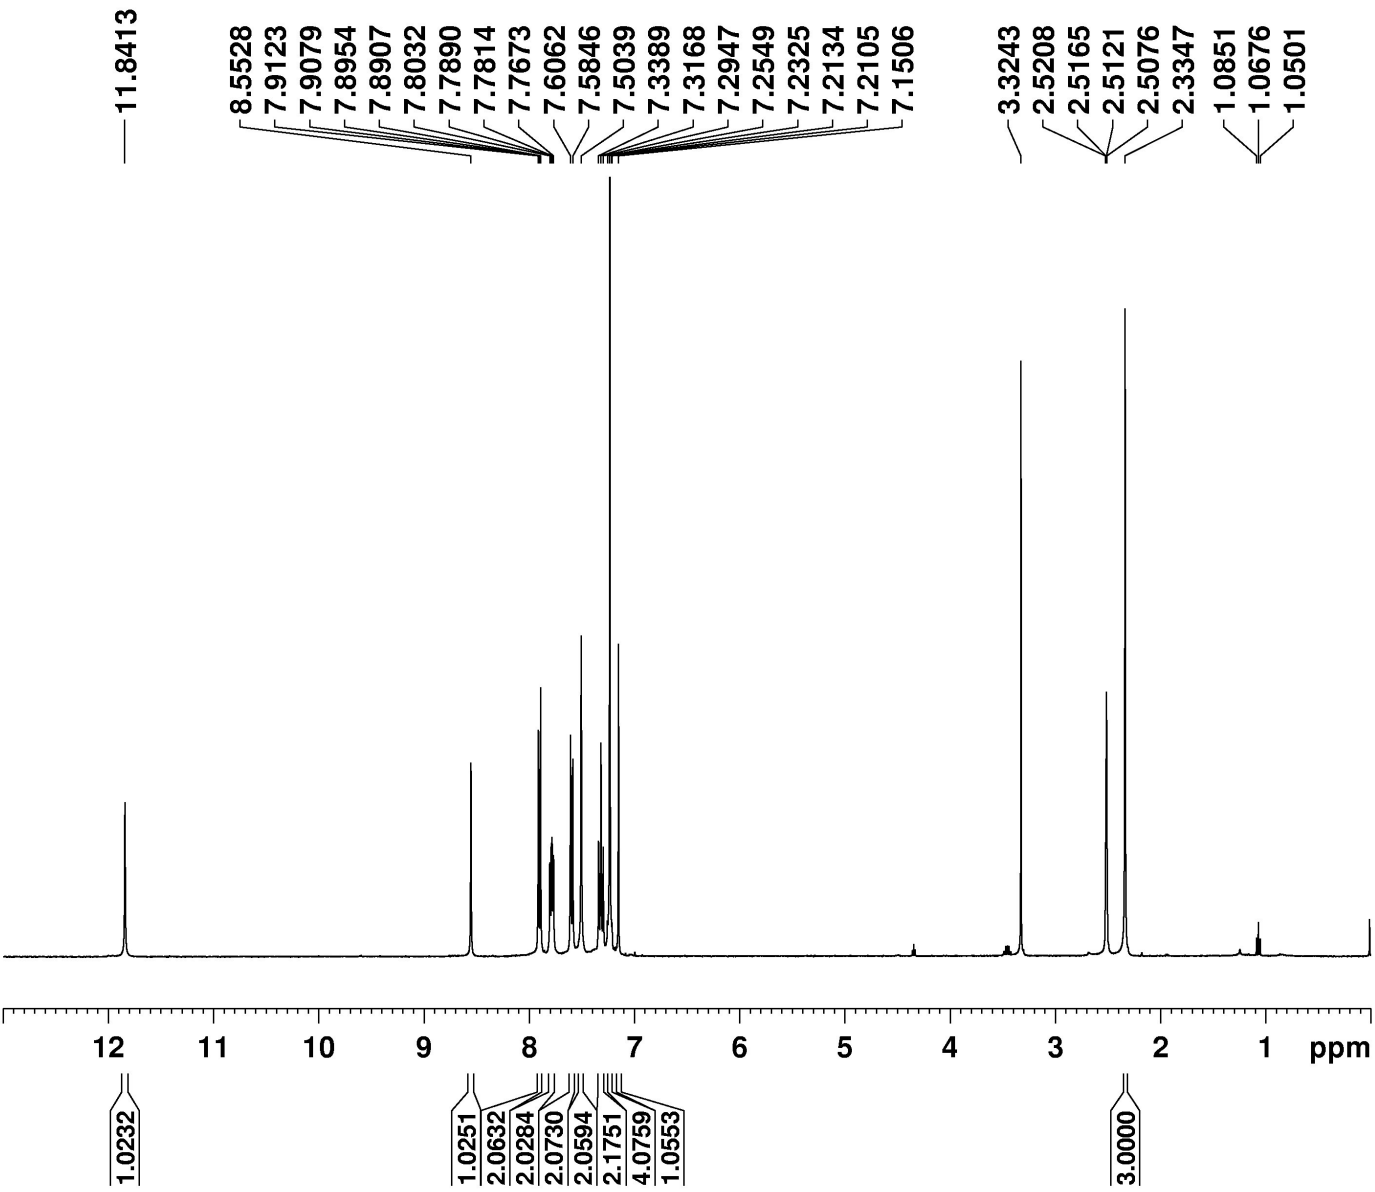

NAME 20141211  
EXPNO 26  
PROCNO 1  
Date\_ 20141211  
Time 13.59  
INSTRUM spect  
PROBHD 5 mm PABBO BB-  
PULPROG zg30  
TD 65536  
SOLVENT DMSO  
NS 8  
DS 2  
SWH 8223.685 Hz  
FIDRES 0.125483 Hz  
AQ 3.9846387 sec  
RG 203  
DW 60.800 usec  
DE 6.50 usec  
TE 300.1 K  
D1 1.00000000 sec

===== CHANNEL f1 =====  
NUC1 1H  
P1 14.65 usec  
SI 65536  
SF 400.100000 MHz  
WDW EM  
SSB 0  
LB 0.30 Hz  
GB 0  
PC 1.00
